# Supplementary material for: Stable isotope-mass spectrometric determination of semen transfer in malaria mosquitoes
Source: Oxford University Press journal article supplement (doi:10.1242/jeb.002642), 2007-03-19
Supplement: jeb002642tables1.pdf [file jeb002642tables1.pdf]

Table S1. *Insemination of females mated with males from experiments 1 and 2*

| Experiment | Duration | Ratio M:F | Treatment | <i>N</i> | Insemination (%) |
|------------|----------|-----------|-----------|----------|------------------|
| 1          | 3        | 2:1       | U-U       | 18       | 100              |
|            | 3        | 2:1       | U-L       | 18       | 100              |
|            | 3        | 2:1       | L-U       | 16       | 94               |
|            | 3        | 2:1       | L-L       | 18       | 100              |
| 2          | 1        | 1:1       | U-U       | 28       | 68               |
|            | 1        | 1:1       | L-U       | 30       | 60               |
|            | 1        | 1:1       | L-L       | 30       | 57               |
|            | 3        | 1:2       | L-U       | 42       | 69               |
|            | 3        | 1:2       | L-U       | 32       | 84               |
|            | 1        | 1:1       | L-U       | 23       | 65               |

Duration is the number of nights mated [to ensure the presence of unmated females in experiment 2, females were introduced at a 1:1 ratio and mating was restricted to one night only. If mating took place over a weekend (e.g. 3 nights of mating), the number of females was doubled]. M, male; F, female. U-U, no label; U-L, adult labelling only; L-U, larval labelling only; L-L, larval plus adult labelling. *N*, number of females dissected.
